# Supplementary material for: Impacts of spatial heterogeneity of anthropogenic aerosol emissions in a regionally-refined global aerosol-climate model
Source: Copernicus journal article supplement (doi:10.5194/egusphere-2023-1055), 2023-07-04
Supplement: Supplementary file [file egusphere-2023-1055-AC1-supplement.pdf]

## Response to Review # 1

We thank the referees for their careful review and constructive comments. We made major revisions to our manuscript in response to all the review comments, including new simulations as well as updated and newly added figures and tables. Below please find our point-by-point responses to referee # 1 (in blue).

### Referee # 1

In this article, the authors update the pre processing and in particular the remapping of emission datasets from the original resolution to the model resolution. This is a problem faced by all atmospheric composition systems and as such, there is a possible interest from the community in such aspects. The paper is well written and organized and the plots are nicely done.

We are pleased to hear that the paper has been well-received and thankful that the referee recognizes the importance of the remapping process of emission datasets for atmospheric composition.

However, I feel that the comparison made in the paper is unfair: it is not a surprise that gradients are better represented with emissions at a resolution corresponding to  $\sim 42\text{km}$  grid than with emissions at  $1.9 \times 2.5^\circ$  resolution. It is very possible that I misunderstood something, but why didn't the authors use the original CEDS or CMIP6 emissions at  $0.25 \times 0.25^\circ$  or  $0.5 \times 0.5^\circ$  as an input to the original emissions treatment (left side of Figure 2b) instead of the  $1.9 \times 2.5^\circ$  resolution?

We appreciate the referee's feedback, which points out the need to provide further clarity in our model's description, particularly in explaining the choice of "default" low-resolution ( $1.9 \times 2.5^\circ$ ) prescribed emissions. In response, we provide a more detailed discussion below on the model's standard configuration, the rationale behind using low-resolution emission data, as well as the basis for our comparisons between high-resolution and low-resolution emissions.

We want to start by emphasizing that the term "emission treatment" in our study refers to the combination of both the (1) prescribed emission input data, and (2) model routines for reading/interpolating them onto the model-native grid. Since the CMIP6 emissions are not on the model's native grids, EAM requires spatial interpolation or remapping (Figure R1). This is the source of the "interpolation error". For fluxes (i.e., emission flux), this remapping should be done conservatively (Jones 1999). The default linear remapping in the standard EAM is non-conservative and may lead to a large interpolation error (error from non-conservation in addition to the interpolation error due to resolution differences) in the standard EAM.

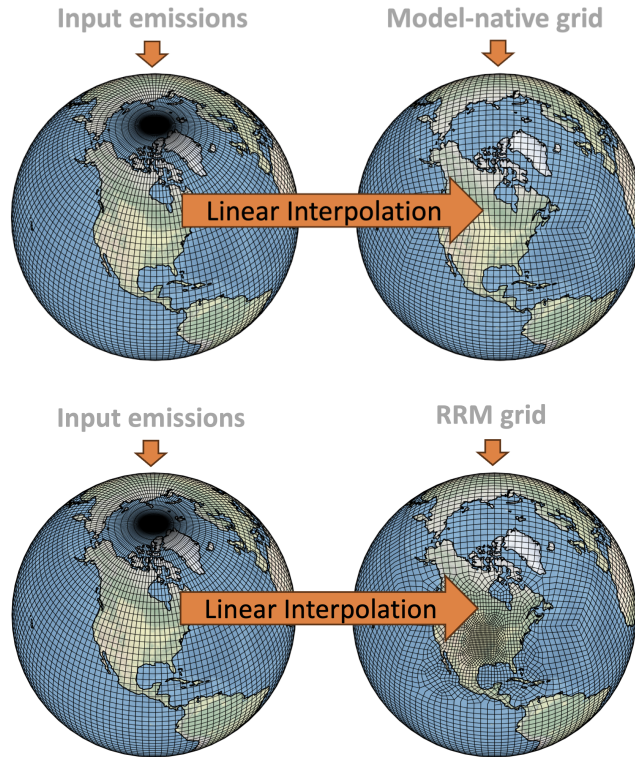

**Figure R1:** A schematic mesh representation of emission input data on regular latitude-longitude grids and EAM model-native spectral element grids. The top panels are for the EAM globally uniform (in resolution) grids, and the bottom panels are for the EAM non-uniform or RRM grids. The horizontal orange arrows represent the interpolation method used in the “default” emission treatment to remap latitude-longitude emissions to model-native emissions.

For global high-res (HR, 0.5-degree) applications (with the uniform grid as in Figure R1 top panels), we can use emission data at higher resolution, where the interpolation error is much smaller. However, linear interpolation of spatially discontinuous variables from a finer grid to a coarser model often leads to significant conservation error. For low-res (LR) and non-uniform RRM grids (Figure R1 bottom panels), directly using the high-res emissions with the linear interpolation will also lead to large conservation errors. Figures R2 and R3 illustrate the errors associated with using low- versus high-resolution emissions on coarser grids. When mass flux is not conserved, errors are exacerbated with the incorporation of high-res (0.5-degree) emissions compared to the low-res (~2-degree) emissions (Fig. R2a, b and R3a, b). These errors may propagate in model simulations and affect simulated aerosol concentrations. Figures R11 and R12 show that the incorporation of 0.5-degree emissions leads to larger differences in the simulated aerosol burden compared to the simulation with the ~2-degree emissions (simulation details in Table R1). To mitigate this issue, E3SM/EAM uses ~2-degree (1.9x2.5) emission data for the LR and RRM simulations as a part of the “default” emission treatment. For global uniform HR simulations, we often use the 0.5-degree emission data.

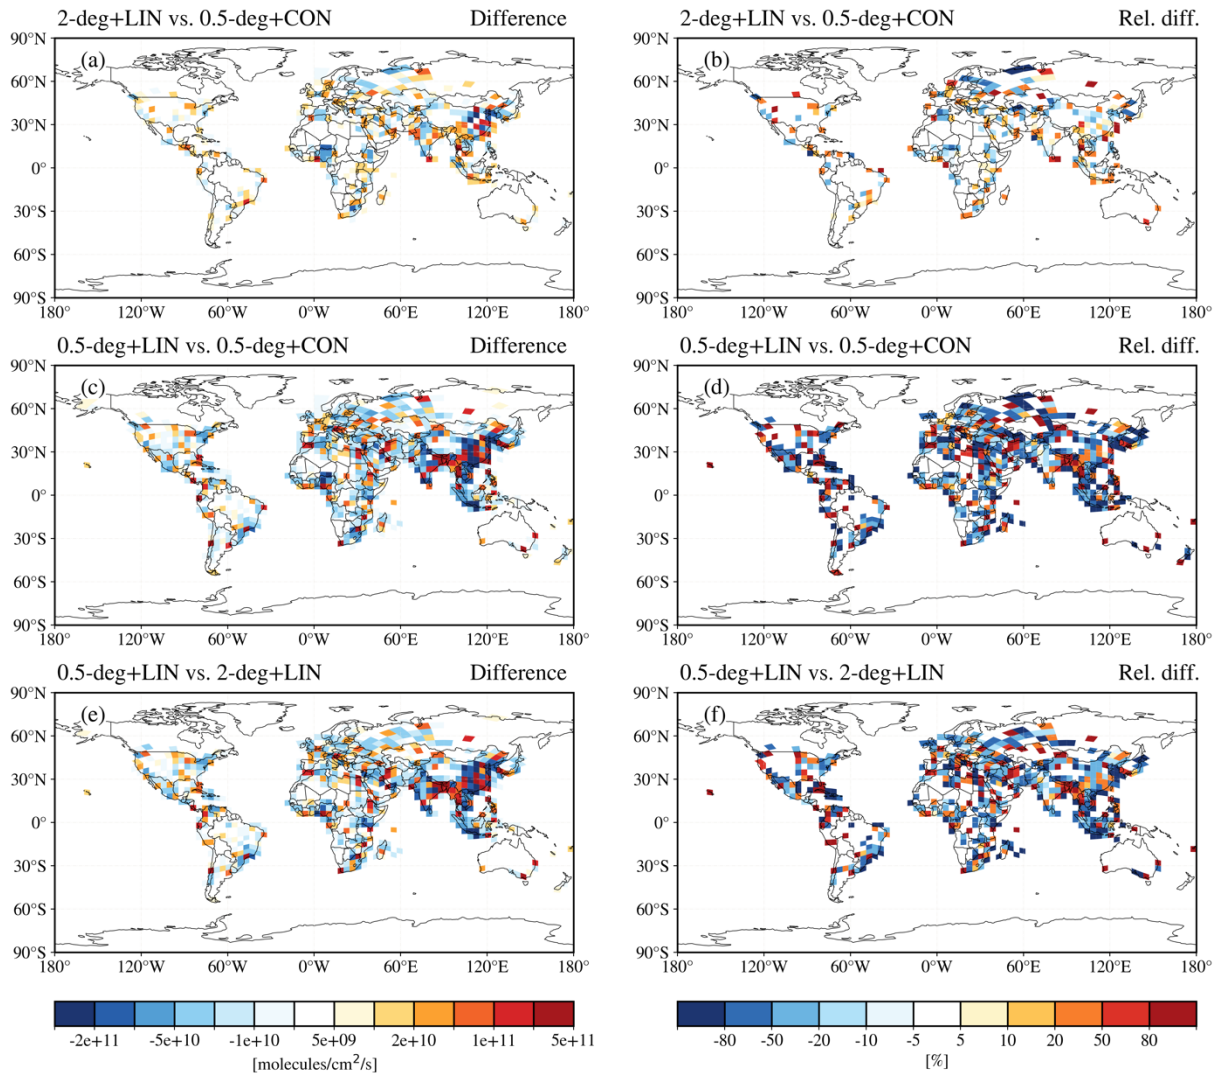

**Figure R2:** Spatial distributions of surface Black Carbon (BC) emission differences among different remapping configurations. Three remapping configurations are exploited, including the conservative remapping of the high-resolution (0.5-degree) emission data onto the EAM ~4-degree physical grids (named “0.5-deg+CON”), the non-conservative linear remapping of the 0.5-degree emission data onto the ~4-degree grids (named “0.5-deg+LIN”), and the non-conservative linear remapping of the low-resolution (2-degree) emission data onto the ~4-degree grids (named “2-deg+LIN”). The first row (a, b) shows the differences between the “2-deg+LIN” and “0.5-deg+CON” remapping configurations, the second row (c, d) is for the differences between the “0.5-deg+LIN” and “0.5-deg+CON” remapping configurations, and the third row (e, f) compares the “0.5-deg+LIN” and “2-deg+LIN” configurations. The emission differences (a, c, e) are shown in the left panels in molecules/cm<sup>2</sup>/s and the relative differences (b, d, f) are shown in the right panels in percent (%).

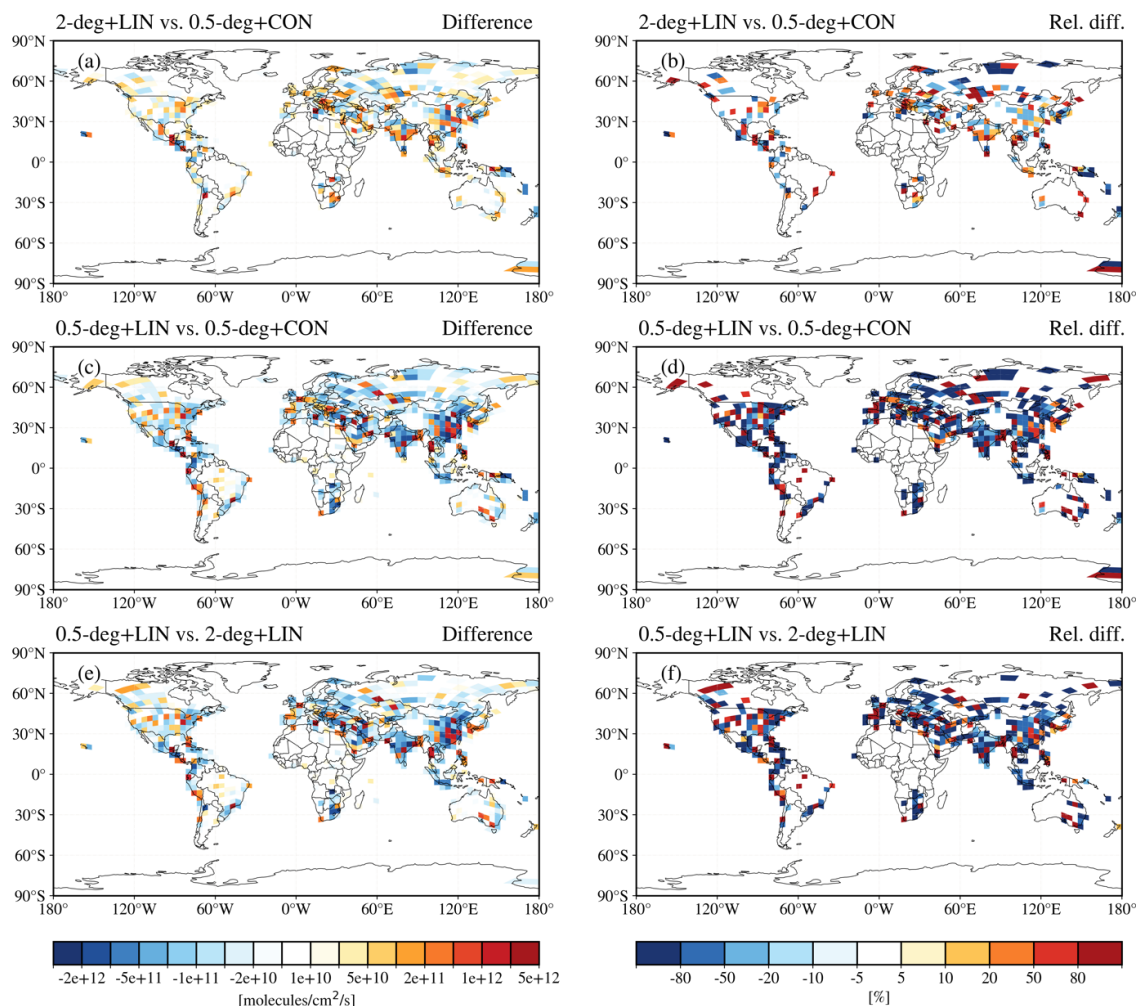

**Figure R3:** Same as Figure R2 but for elevated SO<sub>2</sub> emissions (i.e., energy, industrial, biomass burning, and volcanic sources).

On the other hand, as the referee pointed out, using emission data on a coarse grid will lead to large “heterogeneity” errors due to loss of spatial heterogeneity of high-resolution emissions. Therefore, we propose a “revised” emission treatment in the study, which is a combination of (1) emission data at the highest available resolution and (2) EAM routines to directly read conservatively remapped data in the model-native grid. Thus, we can estimate the error caused by the “default” treatment and provide information to model users on how large errors can be induced in the simulated aerosol properties (e.g., concentrations, optical depth) and aerosol forcing. We think such estimates will be useful for users of the E3SM model or other models with similar emission treatments.

We also believe this evaluation is useful to examine whether using emission data at higher resolutions can significantly change the aerosol simulation. If this is true for 0.25-degree or 0.5-degree simulations, we should consider using even higher-resolution emission data (e.g., the 10-km CEDS emission inventory) for the cloud-permitting scale (e.g., 3 km) model simulations. For instance, the standard configuration of E3SM requires pre-processed emissions data from



CEDS and GFED. The finest resolution emissions currently available for E3SM is approximately 0.5 degrees. Meanwhile, CEDS offers an emission inventory at 10-km resolution (McDuffie, et al. 2020). Based on our findings, there is a compelling case to be made for using higher-resolution emission data to enhance the fidelity of cloud-permitting scale aerosol simulations using our revised emission treatment.

We have included the above discussion in the revised manuscript. Additionally, we have added Figures R2 and R3 as supplementary figures.

Comparing simulations with the old emissions treatment and this high resolution input with simulations with the new emissions treatment using the same input would be more meaningful, and more interesting for the reader. As such, I would recommend a major revision, and suggest to the authors that they rewrite their manuscript in order to show the added value of their new approach but using the same emission datasets as input for the two simulations. Otherwise it is hard to discriminate between the added value of the new emissions treatment and that of using higher resolution emissions (which is well known).

We agree with the assessment from the referee and have undertaken substantial revisions to address the major comments. We agree that it is useful to perform additional simulations to show the impact of the revised emission treatment. To address this, we have performed 4 additional simulations using the same high-res (~0.5-degree) emission data on the latitude-longitude grid as input. Table 1 is updated accordingly as below (Table R1).

**Table R1:** List of simulations performed and analyzed in this study. All simulations, including three low-resolution (LR, ne30pg2) simulations and three regionally refined model (RRM) simulations, are nudged toward the ERA5 reanalysis. The LR simulations have a dynamics grid spacing of ~110 km (~1 degree), while the RRM simulations have high-resolution meshes (dynamics grid spacing of ~28 km) over North America but low-resolution meshes (same as LR) for other areas. EHR indicates that high-resolution emission data (~0.5 degrees), instead of the default low-resolution data (~2 degrees), are used as input. RLL refers to the regular latitude/longitude grids. SE refers to the new emission treatment based on model native spectral element grids. Present-day (PD) and pre-industrial (PI) simulations are conducted with anthropogenic aerosol emissions from the years 2014 and 1850, respectively.

| Group | Simulation name | Model Resolution | Resolution of emission data | Remapping method       |
|-------|-----------------|------------------|-----------------------------|------------------------|
| 1     | LR-PD (PI)      | ne30pg2          | ~2 RLL                      | Linear interpolation   |
|       | LR-EHR-PD (PI)  | ne30pg2          | ~0.5 RLL                    | Linear interpolation   |
|       | LR-SE-PD (PI)   | ne30pg2          | ne30pg2                     | Conservative remapping |
| 2     | RRM-PD (PI)     | NA RRM           | ~2 RLL                      | Linear interpolation   |
|       | RRM-EHR-PD (PI) | NA RRM           | ~0.5 RLL                    | Linear interpolation   |
|       | RRM-SE-PD (PI)  | NA RRM           | NA RRM                      | Conservative remapping |

It's noteworthy that the new "EHR" simulations utilize the same high-resolution emissions as the "SE" simulations. Consequently, the primary differences in error estimates between these two simulations are attributed to interpolation errors and/or conservation errors. Conversely, the error estimates from the RRM-PD and LR-PD simulations include both heterogeneity and interpolation/conservation errors. Therefore, the two types of errors are not distinctly separated. However, it is possible to make an intuitive estimation of the "heterogeneity" errors alone by comparing the discrepancy in error values between the two sets of simulations. For instance, Table R2 depicts the revised Table 2 from the manuscript, which indicates that the normalized RMSE is primarily driven by the "heterogeneity" errors in RRM-PD. This deduction is reasonable given that the conservation error across North American land is comparatively small when comparing the RRM-EHR-PD and RRM-SE-PD simulations.

**Table R2:** EAMv2 anthropogenic aerosol emission data statistics in the default emission treatment for present-day (PD) RRM simulations. Statistics are shown for both the surface and elevated emissions of different aerosol species. All estimates are over the North American land (bounded by 15° – 75°N and 50°W – 170°W). Mean values indicate the area-weighted mean emission fluxes. NMB, NStdDevB, and N\_RMSE are defined as  $\frac{\sum(emis_{lin} - emis_{accurate})}{\sum emis_{accurate}} \times 100\%$ ,  $\frac{stdDev_{lin} - stdDev_{accurate}}{stdDev_{accurate}}$ ,  $\frac{RMSE}{stdDev_{accurate}} \times 100\%$ , respectively. The subscript "accurate" indicates data that preserve spatial heterogeneity and conserve mass. The subscript "lin" indicates linearly interpolated data used in the default treatment. NMB, NStdDevB, RMSE, and N\_RMSE before (after) the slash are estimates for RRM-PD (RRM-EHR-PD). Units of Mean, StdDev, and RMSE are in  $kg\ m^{-2}s^{-1}$ . N\_RMSE and NMB are in percentage (%). NStdDevB is unitless.

| Aerosol | Emission space | Mean [x 10 <sup>-12</sup> ] | NMB                | StdDev [x 10 <sup>-12</sup> ] (accurate) | NStdDevB          | RMSE [x 10 <sup>-12</sup> ] | N_RMSE [%]    |
|---------|----------------|-----------------------------|--------------------|------------------------------------------|-------------------|-----------------------------|---------------|
| BC      | surface        | 5.52                        | -8.961/<br>-0.27   | 12.9                                     | -0.395/<br>-0.028 | 8.71/<br>1.27               | 67.4/<br>9.8  |
|         | elevated       | 1.76                        | -2.704/<br>0.271   | 17.6                                     | -0.423/<br>0.0065 | 12.7/<br>1.38               | 72.2/<br>7.8  |
| POM     | surface        | 19.8                        | -10.504/<br>-0.341 | 51.3                                     | -0.369/<br>-0.02  | 32/<br>4.18                 | 62.3/<br>8.3  |
|         | elevated       | 45                          | -1.295/<br>0.326   | 505                                      | -0.422/<br>0.0078 | 363/<br>38.9                | 71.7/<br>7.7  |
| SO4     | surface        | 0.59                        | 1.025/<br>-0.026   | 1.24                                     | -0.251/<br>-0.015 | 0.67/<br>0.0084             | 54.1/<br>6.8  |
|         | elevated       | 5.37                        | -5.039/<br>-1.31   | 19.1                                     | -0.525/<br>-0.057 | 16.2/<br>2.71               | 84.8/<br>14.1 |

To incorporate the analysis from the new “EHR” simulations in our revised manuscript, we have revised Figures 3, 12, 13, and 14 shown as Figures R4 through R7 here. Figure R4 illustrates regions on a high-resolution mesh within the North American RRM (NA RRM). In these regions, the predominant cause of inaccuracies is driven by loss of "heterogeneity" (Table R2). As a result, the data displayed in panels c and g correspond to similar patterns to those in panels d and h (revised emission treatment), while RRM-PD shows a large difference in the pattern from the other cases.

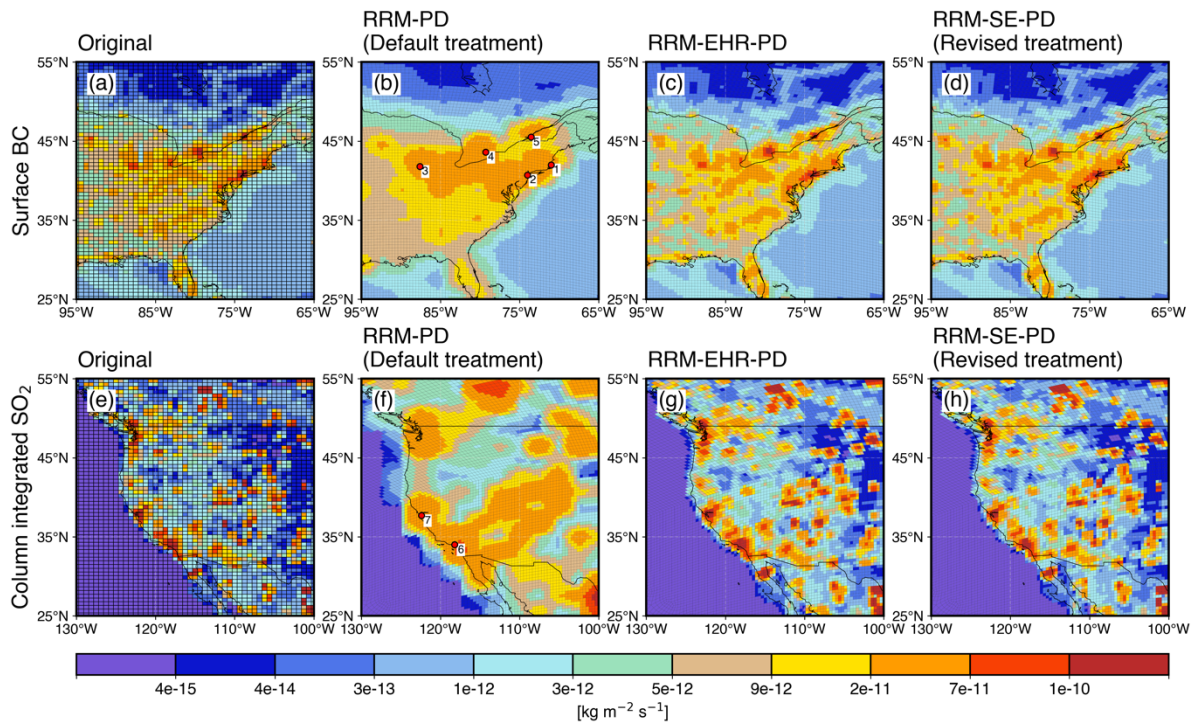

**Figure R4:** Spatial distribution of the present-day surface BC emissions (top) and column-integrated SO<sub>2</sub> emissions (bottom) from the original high-resolution data (a, e), the RRM-PD (default emission treatment) (b, f), the RRM-EHR-PD (c, g) and the RRM-SE-PD (revised emission treatment) (d, h) simulations. SO<sub>2</sub> emissions are taken from elevated sources (i.e., energy, industrial, biomass burning, and volcanic sources). Distributions are shown over the eastern (top row) and western (bottom row) United States for BC (SO<sub>2</sub>) emissions in kg/m<sup>2</sup>/s units. Red circles in panels b and f indicate major cities with large anthropogenic BC and SO<sub>2</sub> emissions respectively. Markers titled 1, 2, 3, 4, 5, 6, and 7 depict Boston, New York, Chicago, Toronto, Montreal, Los Angeles, and San Francisco respectively.

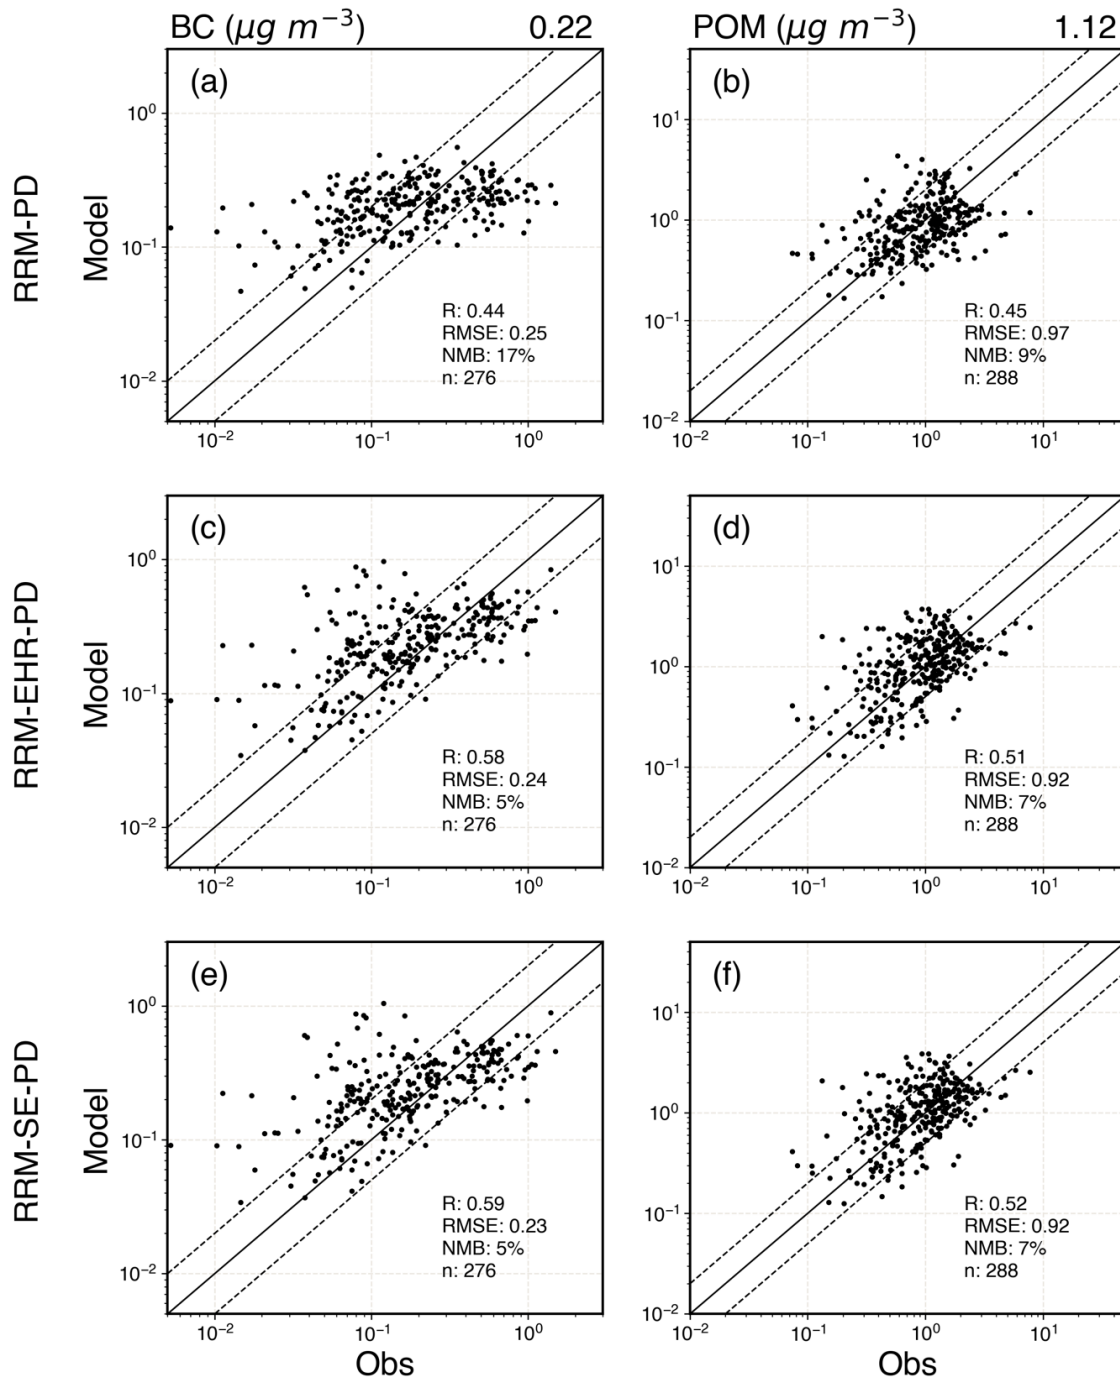

**Figure R5:** Scatter plots between simulated and observed monthly mean surface concentrations of (a, c) Black Carbon (BC) and (b, d) Primary Organic Matter (POM). Observations of the surface concentrations are from IMPROVE for the simulation year of 2016. Scatter plot statistics compare the Spearman's correlation (R), number of data points (n), RMSE, NMB values between (a, b) RRM-PD, (c, d) RRM-EHR-PD, and (e, f) RRM-SE-PD simulation. RMSE and NMB are defined in the caption of Table 2. Solid lines indicate the 1:1 ratio, and the dashed lines indicate the 1:2 and 2:1 ratio. The values at the top of each column indicate the observed mean.



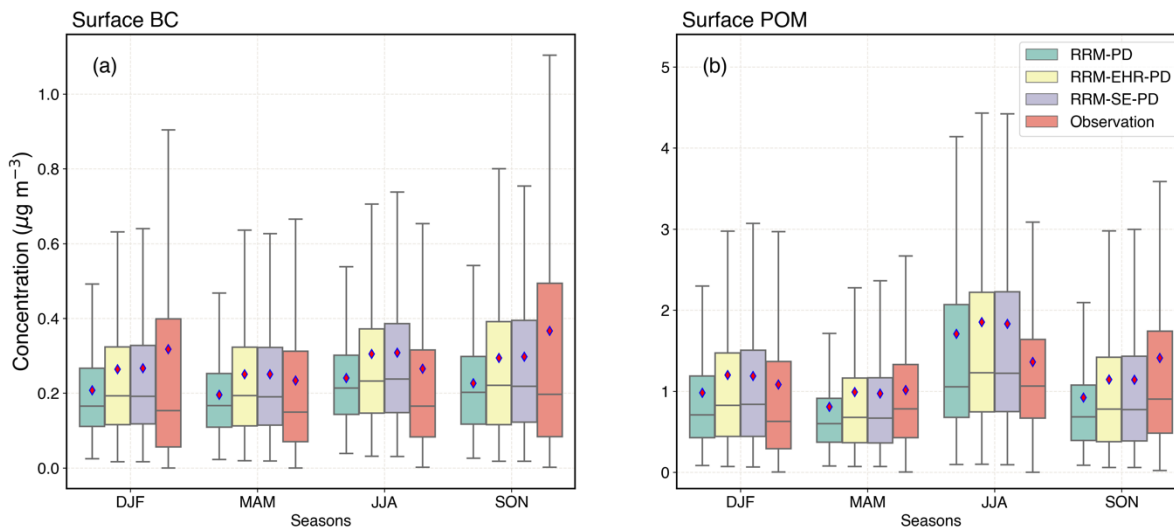

**Figure R6:** Boxplot comparison of the daily mean distribution for (a) BC and (b) POM surface concentrations from RRM-PD simulation, RRM-SE-PD simulation, RRM-EHR-PD simulation and IMPROVE network measurements. The whiskers are based on 1.5 times interquartile range (IQR). Distributions are plotted for different seasons over the simulation year, with red diamonds indicating the seasonal means.

Since over North America the high-resolution emission data are used and the heterogeneity error is small for RRM-EHR-PD, as expected, we don't see substantial differences between RRM-SE-PD and RRM-EHR-PD simulations (Figures R5, R6, and R7). In contrast, we found significant errors over coarse grid regions, which are described later to explain the influence of mass conservation and/or interpolation errors.

We made additional plots of the simulated spatial distributions as in Figures 7 and 8 to illustrate the difference between RRM-SE-PD and RRM-EHR-PD (Figures R8 and R9). These are included as supplementary figures in the revised manuscript. Figures R7 and R8 show reduced normalized RMSE ( $\leq 10\%$ ) from RRM-EHR-PD (compared to RRM-PD) in simulating aerosol surface concentrations and optical properties over North America. As described above, these results are expected since most of the errors over high-res RRM mesh are driven by the "heterogeneity" errors in RRM-PD (Table R2). In addition, we have added a supplementary figure to illustrate larger discrepancies in high-frequency aerosol concentration profiles. Figure R10 shows differences in simulated daily mean BC, POM, and Sulfate concentration profiles and column-integrated burden between RRM-SE-PD and RRM-EHR-PD. We found significant errors ( $>10\%$ ) can exist from loss of conservation alone in high-frequency data.

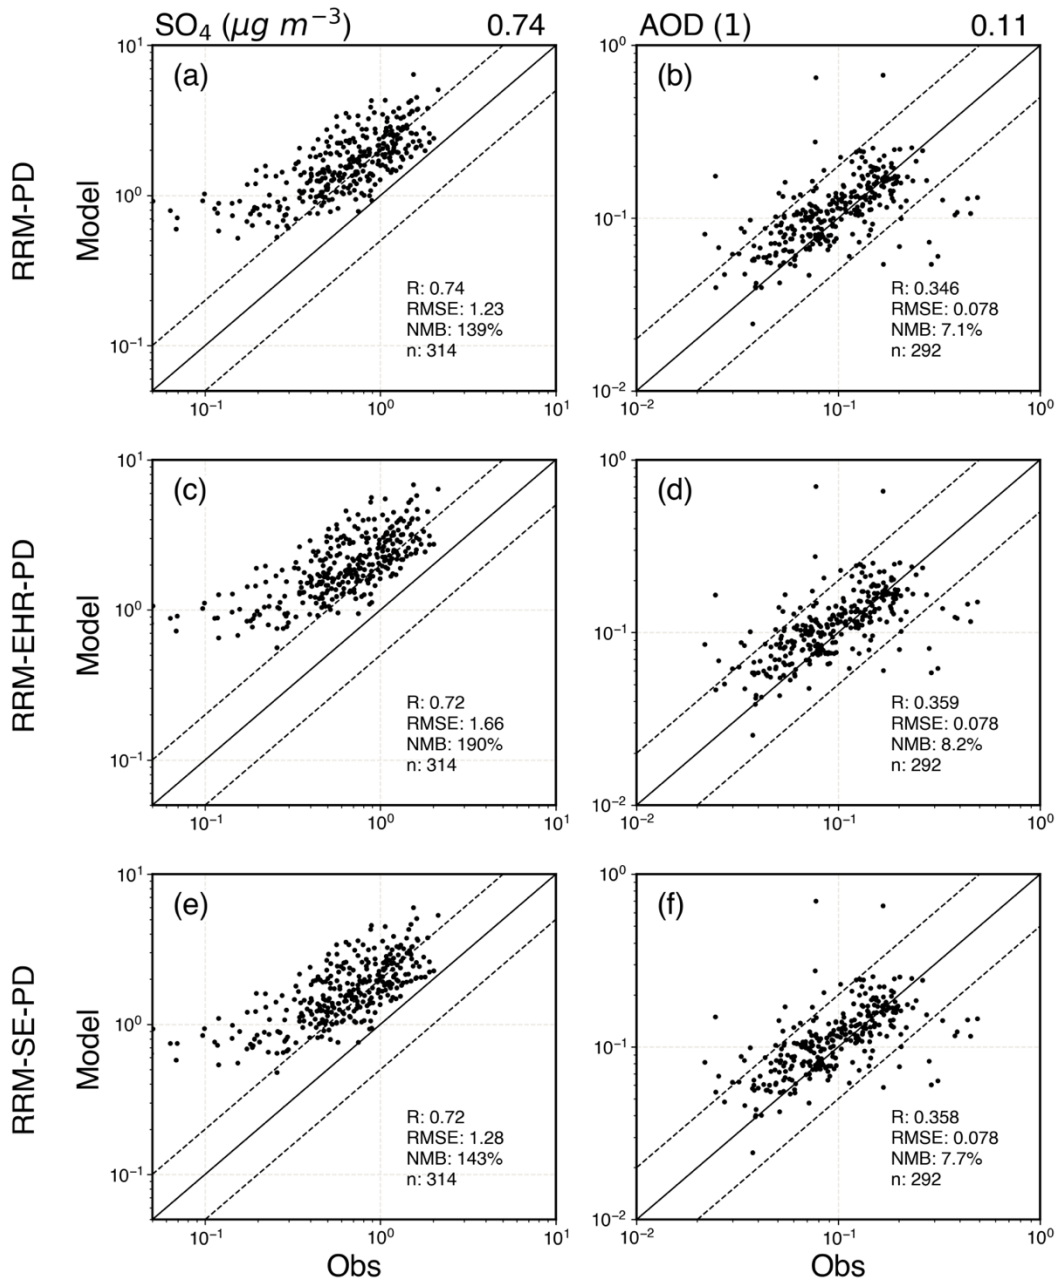

**Figure R7:** Scatter plots between simulated and observed monthly mean surface concentrations of (a, c) sulfate (SO<sub>4</sub>) aerosols and (b, d) Aerosol Optical Depth (AOD) at 550 nm. Observations of the surface concentrations and AOD are from IMPROVE and AERONET respectively for the simulation year of 2016. Scatter plot statistics include the Spearman's correlation (R), number of data points (n), RMSE, NMB values between (a, b) RRM-PD, (c, d) RRM-SE-PD, and (e, f) RRM-EHR-PD simulation. RMSE and NMB are defined in Table 2. Solid lines indicate the 1:1 ratio, and the dashed lines indicate the 1:2 and 2:1 ratio. The values at the top of each column indicate the observed mean.

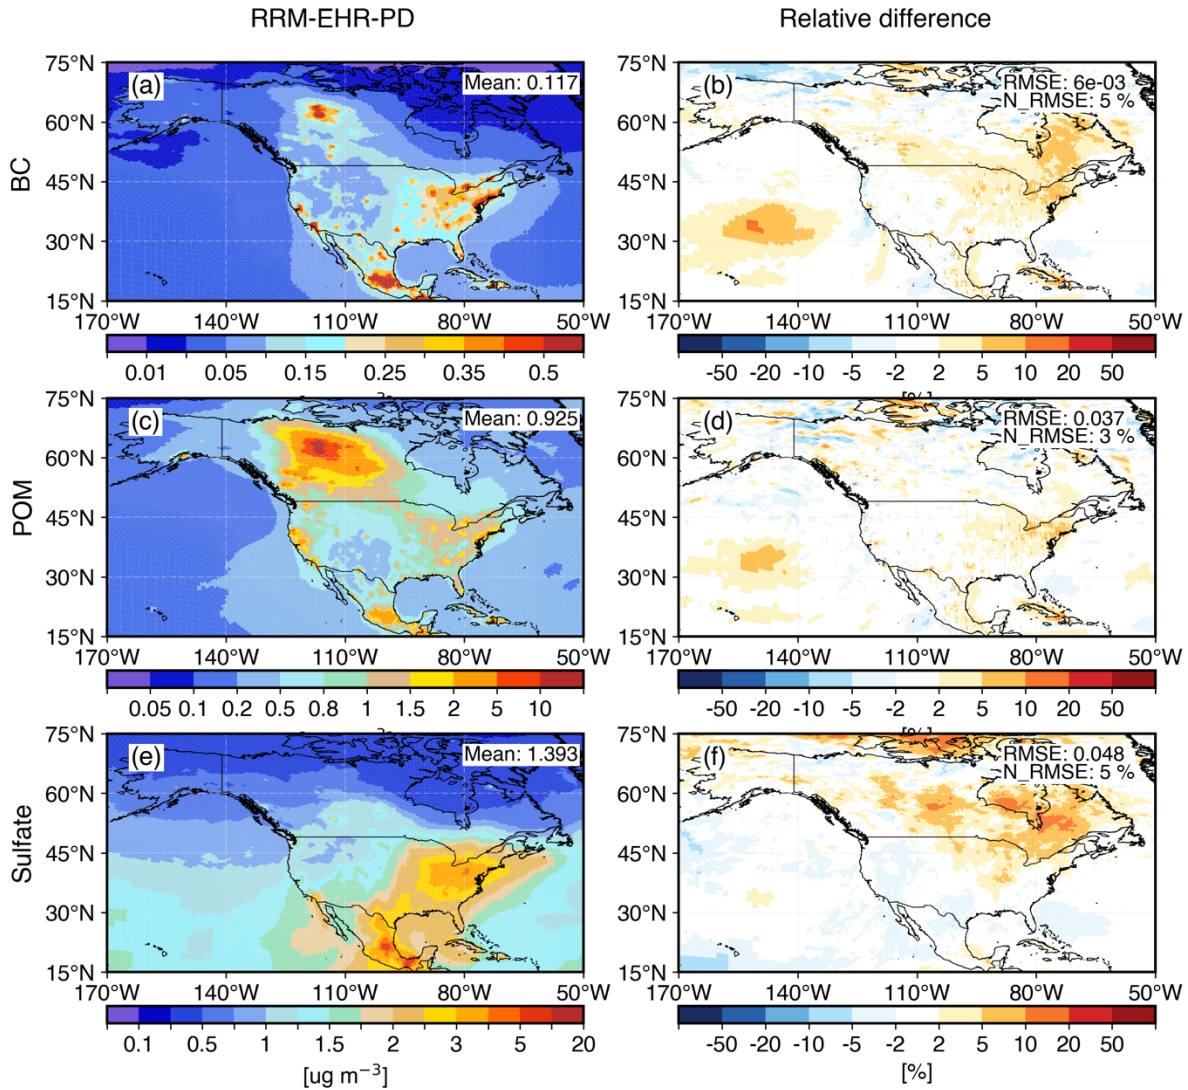

**Figure R8:** Simulated spatial distribution of annual mean aerosol surface concentration from RRM-EHR-PD (left column) and the relative difference between RRM-EHR-PD and RRM-SE-PD (right column) over North America. Distributions are shown for (a, b) Black Carbon (BC), (c, d) Primary Organic Matter (POM), and (e, f) Sulfate aerosols. The relative difference for field X is calculated as:  $\left(\frac{X_{ehr} - X_{se}}{X_{se}}\right) \times 100\%$ , where “se” and “ehr” subscripts refer to the simulations with revised and RRM-EHR-PD emission treatment, respectively. Mean, RMSE, and normalized RMSE (N\_RMSE) are indicated at the top right corner of the panels. Mean and RMSE have units of  $\mu\text{g m}^{-3}$ . N\_RMSE is defined in Table 2.

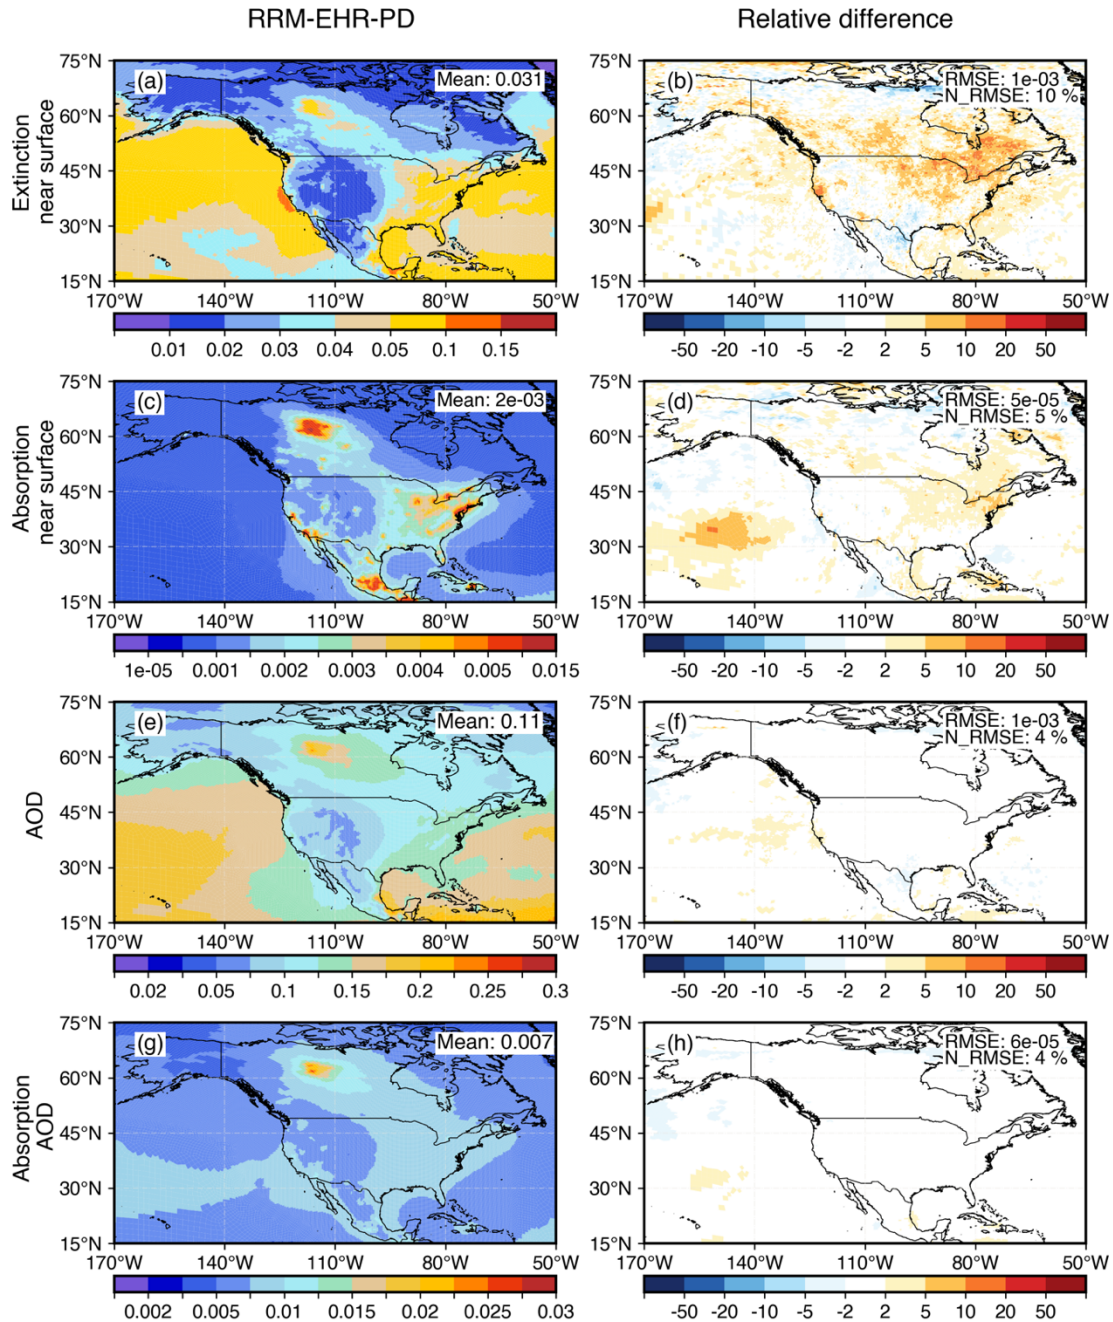

**Figure R9:** Spatial distribution of annual mean simulated (a, b) aerosol extinction at the surface, (c, d) aerosol absorption at the surface, (e, f) Aerosol Optical Depth (AOD), and (g, h) absorbing AOD from RRM-EHR-PD (left column) and the relative difference between RRM-EHR-PD and RRM-SE-PD (right column) over North America. The relative difference for field X is calculated as:  $\left(\frac{X_{ehr} - X_{se}}{X_{se}}\right) \times 100\%$ , where “se” and “ehr” subscripts refer to the simulations with revised and RRM-EHR-PD emission treatment respectively. Mean, RMSE, and normalized RMSE (N\_RMSE) are indicated at the top right corner of the panels. Mean and RMSE have units of  $\mu\text{g m}^{-3}$ . N\_RMSE is defined as in Table 2.



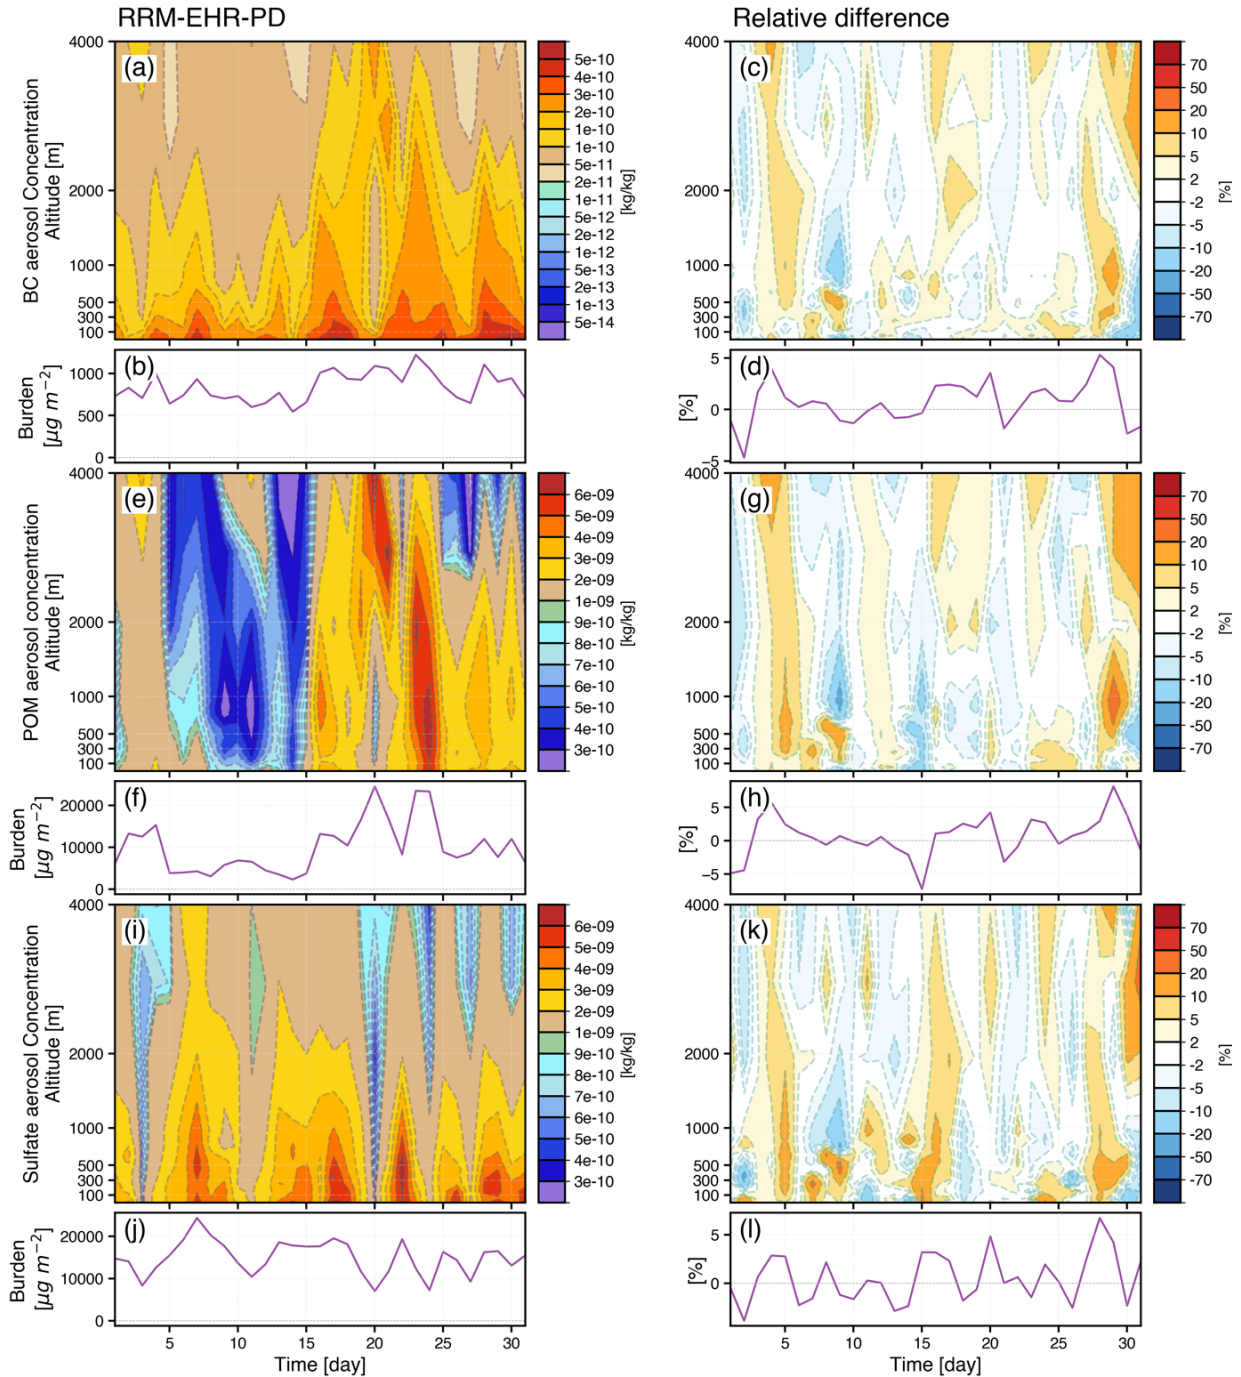

**Figure R10:** Daily mean concentration profile and burden time-series of (a-d) BC, (e-h) POM, and (i-l) Sulfate aerosols. All profiles are shown during the month of July 2016 over highly polluted areas in eastern North America. Simulated vertical distribution and burden time series from RRM-EHR-PD (left column) and the relative difference between RRM-EHR-PD and RRM-SE-PD (right column) are shown.

A side topic of the paper could be the mass conservative aspect of their revised treatment of aerosol emissions – how much does it change emissions as compared to the (I suppose) non mass conservative remapping/interpolation used before? With what impacts on simulated aerosol burden/surface concentration? I think also more detail should be given as to how/with which method is mass conserved in the revised treatment.

We agree that the impact of mass conservation should be described in the manuscript more explicitly. We want to emphasize that the “revised” emission treatment has no conservation error. Since there is little to no heterogeneity difference between RRM-EHR-PD and RRM-SE-PD (Fig. R4), we can compare them to estimate the impact of conservation errors. Therefore, Table R2 and Figure R5-R10 show the emission and simulation errors over finer grids, when emission mass is not conserved. On the other hand, we expect larger impacts over coarser grids (Table R3). For instance, Figures R2c, d and R3c, d illustrate the mass conservation errors in BC and SO<sub>2</sub> emissions over coarser grids.

**Table R3:** EAMv2 anthropogenic aerosol emissions data statistics in the default emission treatment for present-day (PD) RRM simulations over coarser grids. All estimates are over the South Asian land surface (bounded by 0° – 30° N and 60° E – 120° E). Statistics are shown for both the surface and elevated emissions of different aerosol species. Mean values indicate the area-weighted mean emission fluxes. NMB, NStdDevB, and N\_RMSE are defined as  $\frac{\sum(emis_{lin} - emis_{accurate})}{\sum emis_{accurate}} \times 100\%$ ,  $\frac{stdDev_{lin} - stdDev_{accurate}}{stdDev_{accurate}}$ ,  $\frac{RMSE}{stdDev_{accurate}} \times 100\%$ , respectively. The “accurate” subscript indicates data that preserve spatial heterogeneity and conserve mass. The “lin” subscript indicates linearly interpolated data used in the default treatment. NMB, NStdDevB, RMSE, and N\_RMSE estimates are from RRM-PD/RRM-EHR-PD emission data. Units of Mean, StdDev, and RMSE are in kg/m<sup>2</sup>/s. N\_RMSE and NMB are in percentage (%). NStdDevB is unitless.

| Aerosol | Emission space | Mean [x 10 <sup>-12</sup> ] | NMB              | StdDev [x 10 <sup>-12</sup> ] (accurate) | NStdDevB         | RMSE [x 10 <sup>-12</sup> ] | N_RMSE [%]    |
|---------|----------------|-----------------------------|------------------|------------------------------------------|------------------|-----------------------------|---------------|
| BC      | surface        | 76.3                        | -3.091/<br>0.734 | 84.6                                     | -0.236/<br>0.192 | 42.6/<br>30.3               | 50.3/<br>35.7 |
|         | elevated       | 4.1                         | -2.566/<br>4.997 | 9.49                                     | -0.244/<br>0.340 | 4.48/<br>4.89               | 47.1/<br>51.4 |
| POM     | surface        | 286                         | -3.088/<br>0.769 | 278                                      | -0.202/<br>0.151 | 120/<br>85.8                | 43.3/<br>30.9 |
|         | elevated       | 59.6                        | -2.414/<br>2.032 | 177                                      | -0.285/<br>0.306 | 94.4/<br>86                 | 53.4/<br>48.6 |
| SO4     | surface        | 5.56                        | -2.927/<br>0.671 | 7.38                                     | -0.223/<br>0.168 | 3.62/<br>2.27               | 49/<br>30.7   |
|         | elevated       | 32.4                        | -4.259/<br>0.023 | 64.8                                     | -0.381/<br>0.598 | 43.8/<br>57.5               | 67.6/<br>88.7 |

Figures R11 and R12 show the simulated BC and sulfate burden differences between RRM-PD, RRM-EHR-PD, and RRM-SE-PD. In the refined region (NA), the overall differences between the simulations are small. While in other regions (e.g., East Asia), the differences are much larger, where employing the default treatment (RRM-PD, 2deg emission) results in smaller burden differences from RRM-SE-PD (R11b and R12b) compared to from RRM-EHR-PD that uses the high-resolution emission (R11d and R12d).

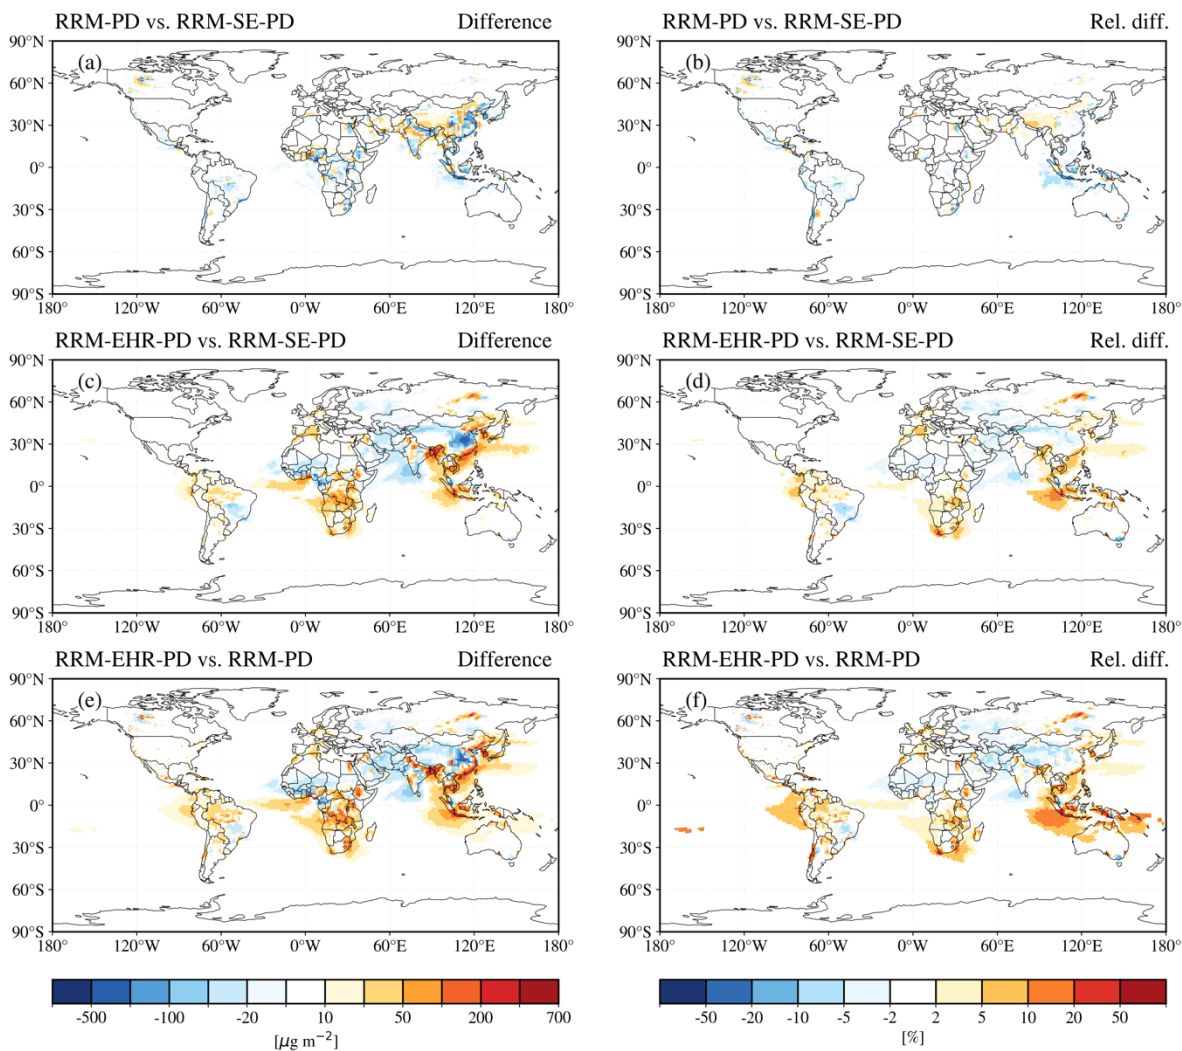

**Figure R11:** Global distribution of simulated BC aerosol burden differences between (a, b) RRM-PD and RRM-SE-PD, (c, d) RRM-EHR-PD and RRM-SE-PD, and (e, f) RRM-EHR-PD and RRM-PD simulations. All column-integrated burden absolute differences are shown in  $\mu\text{g m}^{-2}$  and the relative differences are shown in percent (%).

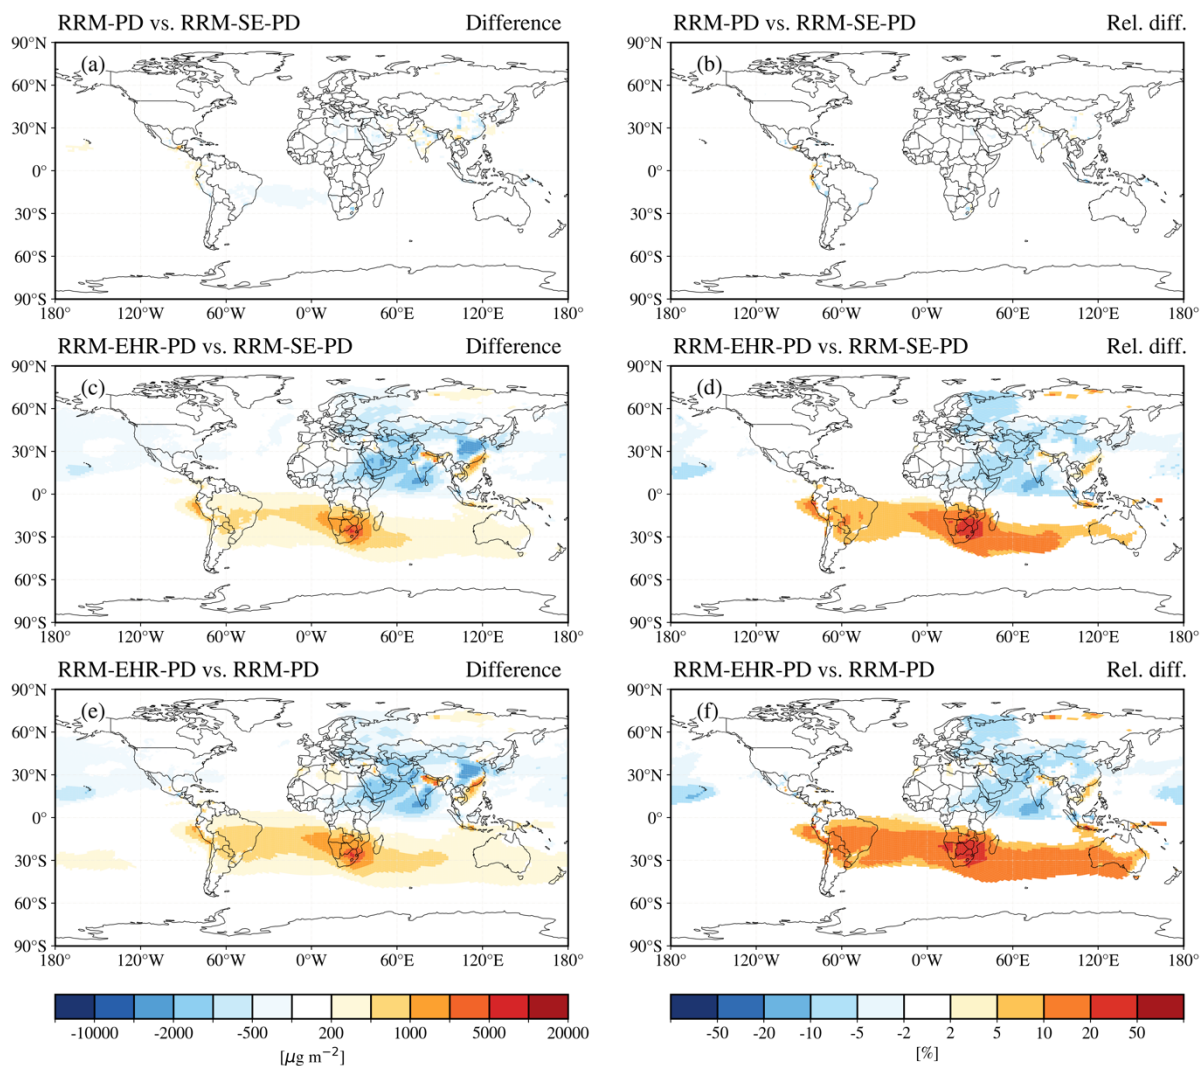

**Figure R12:** Global distribution of simulated sulfate aerosol burden differences between (a, b) RRM-PD and RRM-SE-PD, (c, d) RRM-EHR-PD and RRM-SE-PD, and (e, f) RRM-EHR-PD and RRM-PD simulations. All column-integrated burden absolute differences are shown in  $\mu\text{g m}^{-2}$  and the relative differences are shown in percent (%).

We have included the above discussion along with Figures R11 and R12 in the revised manuscript to describe the impact of non-conservative remapping. We have also added Figures R2, R3, and Table R3 as part of the supplementary materials.



## Works Cited

Jones, Philip W. 1999. "First-and second-order conservative remapping schemes for grids in spherical coordinates." *Monthly Weather Review* 2204-2210.

McDuffie, Erin E, Steven J Smith, Patrick O'Rourke, Kushal Tibrewal, Ch Venkataraman, ra, Eloise A Marais, et al. 2020. "A global anthropogenic emission inventory of atmospheric pollutants from sector-and fuel-specific sources (1970--2017): an application of the Community Emissions Data System (CEDs)." *Earth System Science Data* 3413-3442.
